# Supplementary material for: Introducing a new estimator and test for the weighted all-cause hazard ratio
Source: Springer Nature journal article supplement (doi:10.1186/s12874-019-0765-1), 2019-06-11
Supplement: MOESM1 [file 16797036]

TECHNICAL ADVANCE

# Additional file to the article 'Introducing a new estimator and test for the weighted all-cause hazard ratio': Further Simulation Results

Ann-Kathrin Ozga\* and Geraldine Rauch†

---

\*Correspondence: a.ozga@uke.de  
Institute of Medical Biometry and  
Epidemiology, University Medical  
Center Hamburg-Eppendorf,  
Martinistraße 52, 20246 Hamburg,  
Germany

Full list of author information is  
available at the end of the article  
†geraldine.rauch@charite.de

## Additional Simulation Results

The following two tables show further simulation results with weights of 1 and 0.7 and the same distributions as considered in the main manuscript. The number of simulations is also 1000 with 1000 runs in the permutation test. A total of 100 individuals per treatment group are considered with a minimal follow-up of 1 or 2 years.

**Table 1** Simulation results.

| Sc. | Assumptions for original parametric estimator* | Assumptions for new non-parametric estimator <sup>#</sup> | $\tau$ | Weights    |            | Ln of True WHR                   | Mean number of events (sd) |               | Mean of estimated Ln(WHR) (sd)   |                                    | Power for permutation test weight-based log-rank test |                               |
|-----|------------------------------------------------|-----------------------------------------------------------|--------|------------|------------|----------------------------------|----------------------------|---------------|----------------------------------|------------------------------------|-------------------------------------------------------|-------------------------------|
|     |                                                |                                                           |        | $w_{EP_1}$ | $w_{EP_2}$ | $\ln(\hat{\theta}_{CE}^w(\tau))$ | $EP_1$                     | $EP_2$        | $\ln(\hat{\theta}_{CE}^w(\tau))$ | $\ln(\tilde{\theta}_{CE}^w(\tau))$ | $\hat{\theta}_{CE}^w(\tau)$                           | $\tilde{\theta}_{CE}^w(\tau)$ |
| 1a  | ✓                                              | ✗                                                         | 1      | 1          | 0.7        | -0.86                            | 50.21 (6.51)               | 35.16 (5.21)  | -0.87 (0.25)                     | -0.75 (0.24)                       | 0.97                                                  | 0.97                          |
| 1b  |                                                |                                                           | 2      | 1          | 0.7        | -0.97                            | 72.60 (6.74)               | 80.13 (6.73)  | -0.98 (0.17)                     | -0.86 (0.17)                       | 1.00                                                  | 1.00                          |
| 1c  |                                                |                                                           | 2      | 0.7        | 1          | -1.07                            |                            |               | -1.08 (0.19)                     | -0.98 (0.17)                       | 1.00                                                  | 1.00                          |
| 2a  | ✗                                              | ✗                                                         | 1      | 1          | 0.7        | -0.70                            | 48.22 (6.08)               | 37.15 (5.33)  | -0.77 (0.25)                     | -0.76 (0.24)                       | 0.92                                                  | 0.98                          |
| 2b  |                                                |                                                           | 2      | 1          | 0.7        | -0.68                            | 67.79 (6.75)               | 51.93 (5.60)  | -0.75 (0.20)                     | -0.73 (0.19)                       | 0.98                                                  | 0.99                          |
| 3a  | ✓                                              | ✗                                                         | 1      | 1          | 0.7        | -0.19                            | 39.97 (5.63)               | 47.94 (5.87)  | -0.20 (0.24)                     | -0.36 (0.22)                       | 0.18                                                  | 0.60                          |
| 3b  |                                                |                                                           | 1      | 0.7        | 1          | 0.07                             |                            |               | 0.05 (0.24)                      | -0.08 (0.22)                       | 0.01                                                  | 0.18                          |
| 3c  |                                                |                                                           | 2      | 1          | 0.7        | 0.06                             | 69.84 (6.39)               | 124.63 (6.40) | 0.06 (0.17)                      | -0.08 (0.17)                       | 0.02                                                  | 0.48                          |
| 4a  | ✗                                              | ✗                                                         | 1      | 1          | 0.7        | -0.32                            | 62.84 (6.39)               | 6.49 (2.50)   | -0.14 (0.69)                     | -0.20 (0.25)                       | 0.07                                                  | 0.23                          |
| 4b  |                                                |                                                           | 1      | 0.7        | 1          | -0.26                            |                            |               | -0.08 (0.73)                     | -0.16 (0.25)                       | 0.04                                                  | 0.23                          |
| 4c  |                                                |                                                           | 2      | 1          | 0.7        | -0.42                            | 86.66 (6.95)               | 24.29 (4.57)  | -0.20 (0.24)                     | -0.25 (0.19)                       | 0.14                                                  | 0.43                          |
| 4d  |                                                |                                                           | 2      | 0.7        | 1          | -0.39                            |                            |               | -0.17 (0.28)                     | -0.23 (0.20)                       | 0.09                                                  | 0.40                          |
| 5a  | ✗                                              | ✗                                                         | 1      | 1          | 0.7        | -0.45                            | 133.27 (6.26)              | 19.31 (4.05)  | -0.65 (0.38)                     | -0.71 (0.16)                       | 0.94                                                  | 1.00                          |
| 5b  |                                                |                                                           | 1      | 0.7        | 1          | -0.35                            |                            |               | -0.51 (0.42)                     | -0.61 (0.17)                       | 0.66                                                  | 1.00                          |
| 6a  | ✓                                              | ✗                                                         | 2      | 1          | 0.7        | 0.00                             | 67.04 (6.74)               | 56.49 (6.37)  | 0.00 (0.18)                      | 0.00 (0.18)                        | 0.02                                                  | 0.07                          |
| 6b  |                                                |                                                           | 2      | 0.7        | 1          | 0.60                             |                            |               | 0.60 (0.16)                      | 0.60 (0.16)                        | 0.00                                                  | 0.06                          |
| 7a  | ✓                                              | ✓                                                         | 2      | 1          | 0.7        | 0.51                             | 15.83 (3.84)               | 141.89 (6.18) | 0.51 (0.17)                      | 0.52 (0.16)                        | 0.00                                                  | 0.00                          |
| 7b  |                                                |                                                           | 2      | 0.7        | 1          | 0.15                             |                            |               | 0.16 (0.18)                      | 0.16 (0.21)                        | 0.01                                                  | 0.00                          |
| 8a  | ✗                                              | ✓                                                         | 2      | 1          | 0.7        | -0.74                            | 108.25 (6.93)              | 78.79 (6.69)  | -0.90 (0.19)                     | -0.75 (0.16)                       | 1.00                                                  | 1.00                          |
| 8b  |                                                |                                                           | 2      | 0.7        | 1          | -0.86                            |                            |               | -1.02 (0.20)                     | -0.87 (0.16)                       | 1.00                                                  | 1.00                          |
| 9a  | ✗                                              | ✗                                                         | 1      | 0.7        | 1          | -0.61                            | 132.78 (6.43)              | 15.22 (3.56)  | -0.76 (0.21)                     | -0.63 (0.16)                       | 0.97                                                  | 0.99                          |
| 9b  |                                                |                                                           | 2      | 1          | 0.7        | -0.53                            | 178.24 (4.21)              | 21.76 (4.21)  | -0.85 (0.27)                     | -0.58 (0.16)                       | 0.99                                                  | 0.99                          |
| 9c  |                                                |                                                           | 2      | 0.7        | 1          | -0.55                            |                            |               | -0.97 (0.33)                     | -0.63 (0.18)                       | 0.98                                                  | 1.00                          |
| 10a | ✗                                              | ✗                                                         | 1      | 1          | 0.7        | -0.74                            | 84.95 (7.02)               | 62.44 (6.34)  | -0.73 (0.17)                     | -0.74 (0.17)                       | 0.99                                                  | 1.00                          |
| 10b |                                                |                                                           | 1      | 0.7        | 1          | -0.80                            |                            |               | -0.82 (0.17)                     | -0.84 (0.17)                       | 1.00                                                  | 1.00                          |
| 10c |                                                |                                                           | 2      | 1          | 0.7        | -0.74                            | 113.64 (6.92)              | 80.58 (6.55)  | -0.68 (0.14)                     | -0.75 (0.16)                       | 1.00                                                  | 1.00                          |
| 10d |                                                |                                                           | 2      | 0.7        | 1          | -0.76                            |                            |               | -0.76 (0.14)                     | -0.83 (0.16)                       | 1.00                                                  | 1.00                          |

Ln: natural logarithm; WHR: Weighted all-cause hazard ratio; sd: Standard deviation;

\*It is assumed that the Weibull model used to estimate the cause-specific hazards is the correct one;

<sup>#</sup>It is assumed that the cause-specific baseline hazards are equal.

**Table 2 Simulation results: Performance.**

| Sc.        | Amount of Simulations            |                                  | Bias                             |                                  | Standardized Bias                |                                  | $\sqrt{\text{Mean Square Error}}$ |                                  | Relative Efficiency | Coverage*                                                                         |                                  |
|------------|----------------------------------|----------------------------------|----------------------------------|----------------------------------|----------------------------------|----------------------------------|-----------------------------------|----------------------------------|---------------------|-----------------------------------------------------------------------------------|----------------------------------|
|            | $\ln(\hat{\theta}_{CE}^w(\tau))$ | $\ln(\hat{\theta}_{CE}^w(\tau))$ | $\ln(\hat{\theta}_{CE}^w(\tau))$ | $\ln(\hat{\theta}_{CE}^w(\tau))$ | $\ln(\hat{\theta}_{CE}^w(\tau))$ | $\ln(\hat{\theta}_{CE}^w(\tau))$ | $\ln(\hat{\theta}_{CE}^w(\tau))$  | $\ln(\hat{\theta}_{CE}^w(\tau))$ |                     | $\frac{MSE(\ln(\hat{\theta}_{CE}^w(\tau)))}{MSE(\ln(\hat{\theta}_{CE}^w(\tau)))}$ | $\ln(\hat{\theta}_{CE}^w(\tau))$ |
| <b>1a</b>  | 991                              | 1000                             | -0.02                            | 0.10                             | -0.07                            | 0.43                             | 0.25                              | 0.26                             | 0.93                | 92.84                                                                             | 90.00                            |
| <b>1b</b>  | 997                              | 1000                             | -0.01                            | 0.11                             | -0.05                            | 0.66                             | 0.17                              | 0.20                             | 0.75                | 94.48                                                                             | 88.80                            |
| <b>1c</b>  | 997                              | 1000                             | -0.01                            | 0.09                             | -0.05                            | 0.50                             | 0.19                              | 0.20                             | 0.97                | 95.29                                                                             | 92.30                            |
| <b>2a</b>  | 1000                             | 1000                             | -0.07                            | -0.06                            | -0.30                            | -0.26                            | 0.26                              | 0.25                             | 1.08                | 92.70                                                                             | 92.50                            |
| <b>2b</b>  | 999                              | 1000                             | -0.07                            | -0.06                            | -0.36                            | -0.31                            | 0.21                              | 0.20                             | 1.09                | 91.89                                                                             | 93.10                            |
| <b>3a</b>  | 1000                             | 1000                             | -0.02                            | -0.17                            | -0.06                            | -0.78                            | 0.24                              | 0.28                             | 0.73                | 92.60                                                                             | 87.30                            |
| <b>3b</b>  | 1000                             | 1000                             | -0.02                            | -0.15                            | -0.06                            | -0.67                            | 0.25                              | 0.27                             | 0.85                | 93.60                                                                             | 89.40                            |
| <b>3c</b>  | 1000                             | 1000                             | 0.00                             | -0.14                            | -0.01                            | -0.82                            | 0.17                              | 0.22                             | 0.60                | 92.48                                                                             | 78.95                            |
| <b>4a</b>  | 993                              | 1000                             | 0.17                             | 0.12                             | 0.25                             | 0.47                             | 0.72                              | 0.28                             | 6.77                | 90.76                                                                             | 91.94                            |
| <b>4b</b>  | 993                              | 1000                             | 0.18                             | 0.09                             | 0.24                             | 0.36                             | 0.76                              | 0.26                             | 8.13                | 92.56                                                                             | 92.65                            |
| <b>4c</b>  | 996                              | 1000                             | 0.21                             | 0.17                             | 0.90                             | 0.85                             | 0.32                              | 0.26                             | 1.53                | 84.21                                                                             | 85.57                            |
| <b>4d</b>  | 996                              | 1000                             | 0.22                             | 0.17                             | 0.78                             | 0.84                             | 0.36                              | 0.26                             | 1.88                | 87.42                                                                             | 86.17                            |
| <b>5a</b>  | 995                              | 1000                             | -0.21                            | -0.26                            | -0.55                            | -1.62                            | 0.43                              | 0.31                             | 1.91                | 82.50                                                                             | 62.56                            |
| <b>5b</b>  | 995                              | 1000                             | -0.16                            | -0.26                            | -0.39                            | -1.55                            | 0.45                              | 0.31                             | 2.08                | 89.74                                                                             | 64.56                            |
| <b>6a</b>  | 998                              | 1000                             | 0.00                             | 0.00                             | 0.00                             | 0.00                             | 0.18                              | 0.18                             | 1.04                | 95.19                                                                             | 95.20                            |
| <b>6b</b>  | 998                              | 1000                             | -0.00                            | -0.00                            | -0.01                            | -0.00                            | 0.20                              | 0.18                             | 1.26                | 95.89                                                                             | 95.40                            |
| <b>7a</b>  | 984                              | 1000                             | 0.00                             | 0.01                             | 0.00                             | 0.04                             | 0.17                              | 0.16                             | 1.08                | 94.51                                                                             | 94.09                            |
| <b>7b</b>  | 984                              | 1000                             | 0.00                             | 0.01                             | 0.01                             | 0.04                             | 0.16                              | 0.16                             | 1.01                | 95.41                                                                             | 94.89                            |
| <b>8a</b>  | 1000                             | 1000                             | -0.16                            | -0.01                            | -0.83                            | -0.03                            | 0.25                              | 0.16                             | 2.45                | 84.20                                                                             | 93.30                            |
| <b>8b</b>  | 1000                             | 1000                             | -0.17                            | -0.01                            | -0.84                            | -0.04                            | 0.26                              | 0.16                             | 2.56                | 83.80                                                                             | 92.90                            |
| <b>9a</b>  | 998                              | 998                              | -0.15                            | -0.02                            | -0.75                            | -0.13                            | 0.26                              | 0.17                             | 2.42                | 88.68                                                                             | 95.35                            |
| <b>9b</b>  | 990                              | 1000                             | -0.32                            | -0.05                            | -1.19                            | -0.28                            | 0.41                              | 0.17                             | 6.25                | 64.14                                                                             | 92.20                            |
| <b>9c</b>  | 990                              | 1000                             | -0.42                            | -0.08                            | -1.30                            | -0.49                            | 0.53                              | 0.19                             | 7.60                | 55.86                                                                             | 88.30                            |
| <b>10a</b> | 1000                             | 1000                             | 0.01                             | -0.00                            | 0.06                             | -0.02                            | 0.17                              | 0.17                             | 0.98                | 94.30                                                                             | 94.70                            |
| <b>10b</b> | 1000                             | 1000                             | -0.02                            | -0.03                            | -0.11                            | -0.20                            | 0.17                              | 0.17                             | 0.97                | 93.90                                                                             | 94.20                            |
| <b>10c</b> | 1000                             | 1000                             | 0.06                             | -0.01                            | 0.45                             | -0.05                            | 0.16                              | 0.16                             | 0.95                | 92.40                                                                             | 92.70                            |
| <b>10d</b> | 1000                             | 1000                             | -0.01                            | -0.08                            | -0.03                            | -0.49                            | 0.14                              | 0.18                             | 0.62                | 94.20                                                                             | 90.10                            |

\* Defined as proportion of times the 95%-confidence interval for the estimator includes the true effect.
